# Supplementary material for: Direct route of ultrafast charge-pair generation upon below-band-gap excitation in P3HT: effect of external electric field
Source: Royal Society of Chemistry journal article supplement (doi:10.1039/d4cp04342a), 2025-01-01
Supplement: d4cp04342a1.pdf [file d4cp04342a1.pdf]

## Electronic Supplementary Information

### Direct Route of Ultrafast Charge-Pair Generation Upon Below-Band-Gap Excitation in P3HT: Effect of External Electric Field

Debkumar Rana<sup>†\*</sup>, Ayush Kant Ranga, Arnulf Materny<sup>\*</sup>

School of Science, Constructor University, Campus Ring 1, 28759 Bremen, Germany

\*Corresponding authors: debkumar.rana@mbi-berlin.de; amaterny@constructor.university

<sup>†</sup>Present affiliation: Max Born Institut für Nichtlineare Optik und Kurzzeitspektroskopie,  
Max Born Strasse 2A, 12489 Berlin, Germany

## 1. UV-Vis Absorption of P3HT

The UV-Vis absorption of neat P3HT thin film is shown in Fig. S1. The regioregular P3HT thin film shows a broad absorption from 365 nm to 680 nm with three distinct features at 507, 553 and 598 nm. The spin-cast thin film shows the characteristic transitions related to inter-chain exciton delocalization and a significant coupling to vibrations. The ratio of the amplitudes of the  $A_{0-0}$  (598 nm) and the  $A_{0-1}$  (553 nm) peaks is characteristic for partially ordered H-aggregate-like chains coexisting with non-aggregated chain sequences. The absorption strength on the higher wavelength side after 620 nm is extremely low, but not zero.

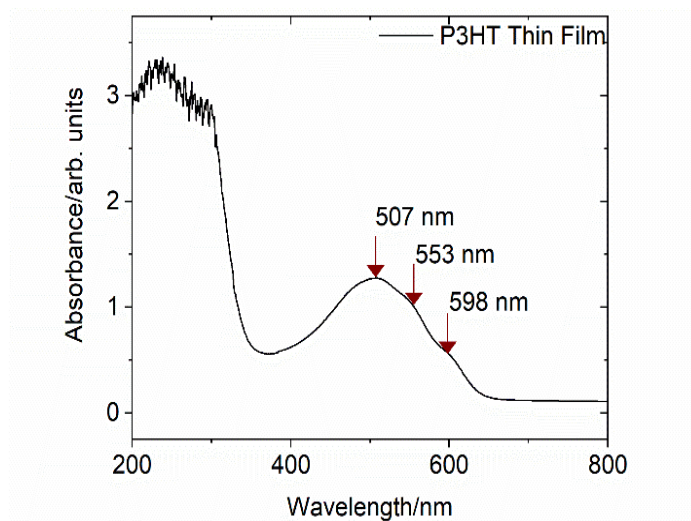

**Fig. S1** UV-Vis absorption spectrum of the neat P3HT thin film.

## 2. IV Characteristics of P3HT-Only Diode

The arrangement of the P3HT-only diode shown in Fig. S2 allows for the application of an external electric field. The asymmetry of the layers results in an internal field of -0.8 V.

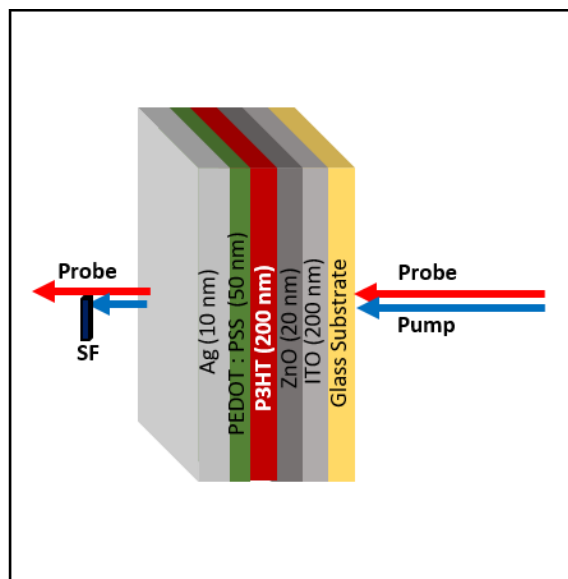

Fig. S2 P3HT device structure.

Figure S3 shows the current-voltage ( $I$ - $V$ ) characteristics of the P3HT device measured in the dark and when light is shining on it. An illumination with an air mass 1.5 sun spectrum, which is equivalent to a power density of  $100 \text{ mW cm}^{-2}$  was used for the measurement under light.

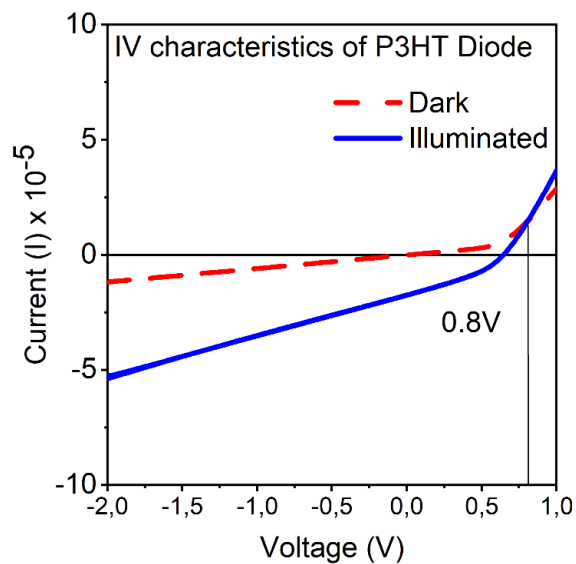

Fig. S3 I-V characteristics of the P3HT diode.

### 3. Transient at 520 nm Excitation

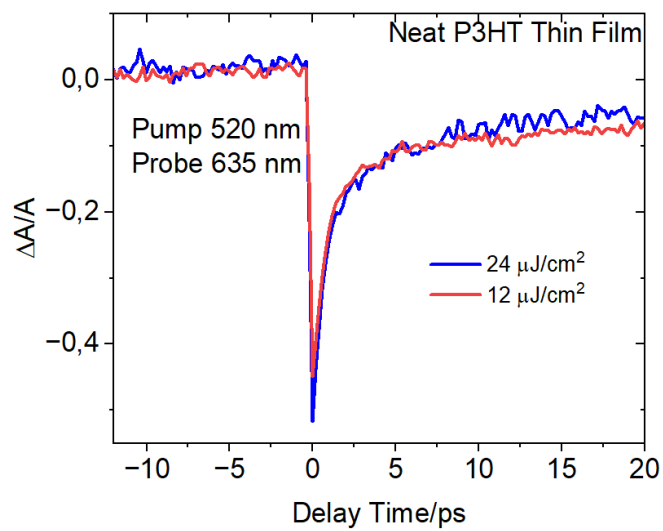

**Fig. S4** Differential transient transmission dynamics ( $\Delta T/T$ ) obtained from the neat P3HT thin film probing the polaron pair dynamics at 635 nm after 520 nm excitation with two different fluences.

## 4. Fitting Results

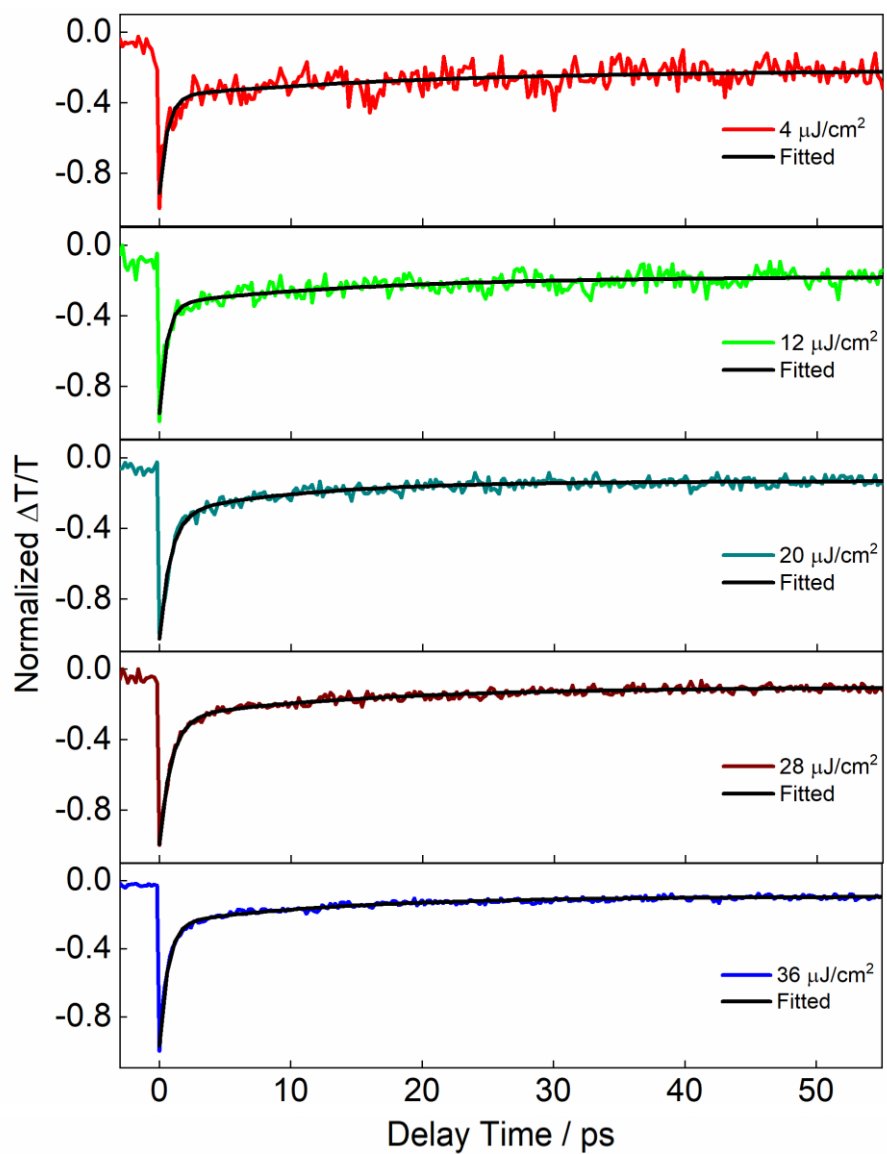

**Fig. S5** Fitting results using the exponential model for the differential transient transmission dynamics ( $\Delta T/T$ ) obtained from the neat P3HT thin film at different excitation fluences where pump and probe both were at 638 nm.

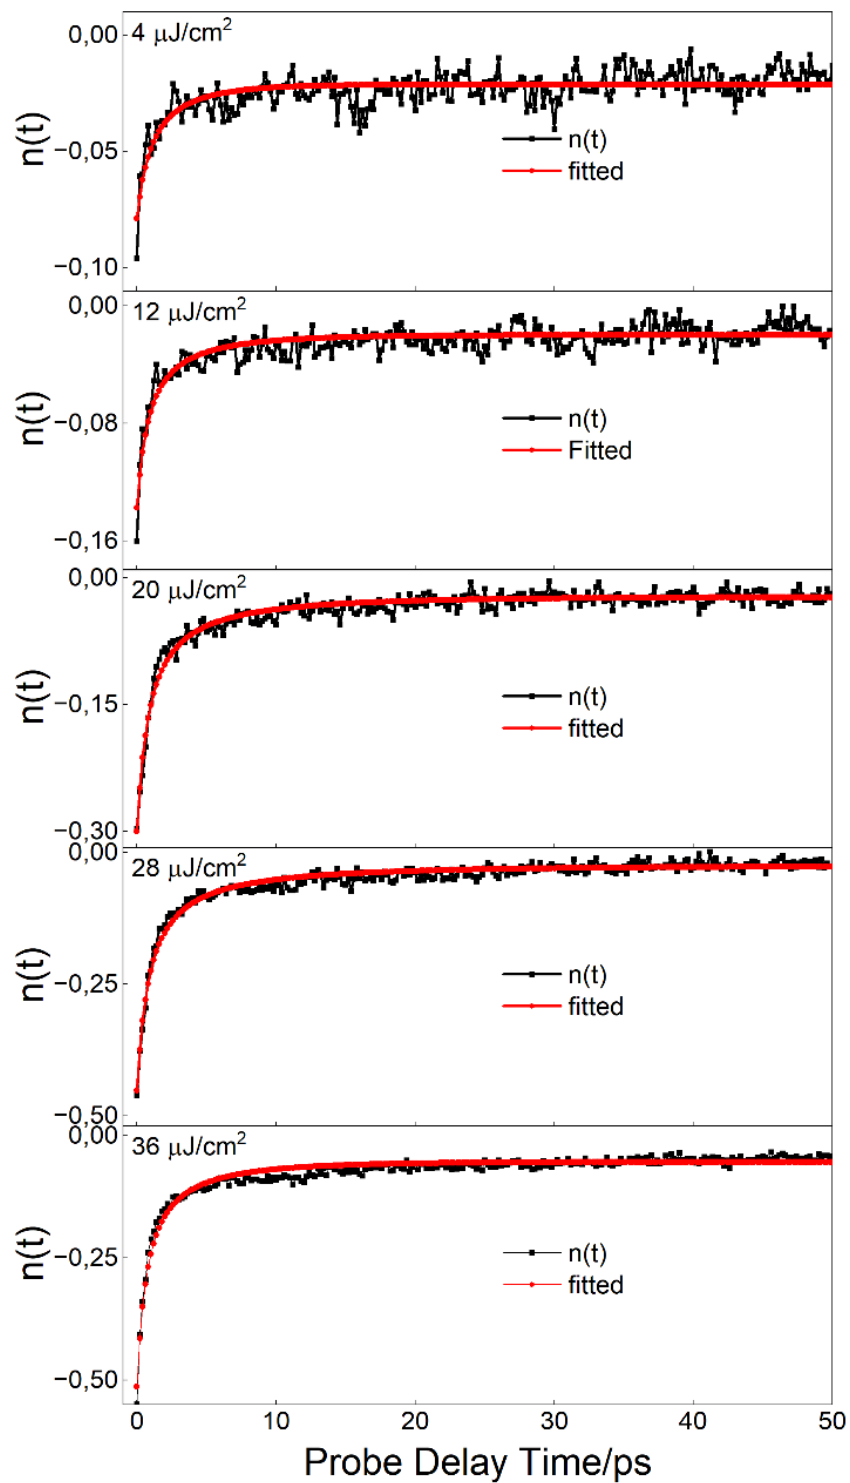

**Fig. S6** Fitting results using the annihilation model for the differential transient transmission dynamics ( $\Delta T/T$ ) obtained from the neat P3HT thin film at different excitation fluences where pump and probe both were at 638 nm.

## 5. Annihilation Rate

We have plotted the annihilation rate with the change of excitation fluence in Fig. S4. At higher excitation fluences, the annihilation rate is constant.

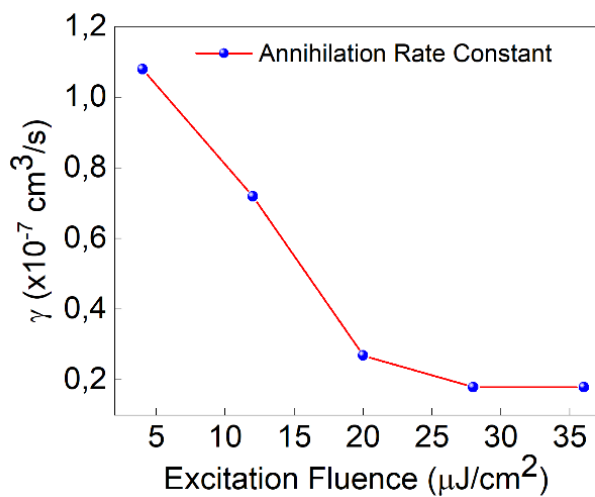

**Fig. S7** Annihilation rate constant of delocalized polarons in neat P3HT thin film.

## 6. Fitting of Observed Dynamics

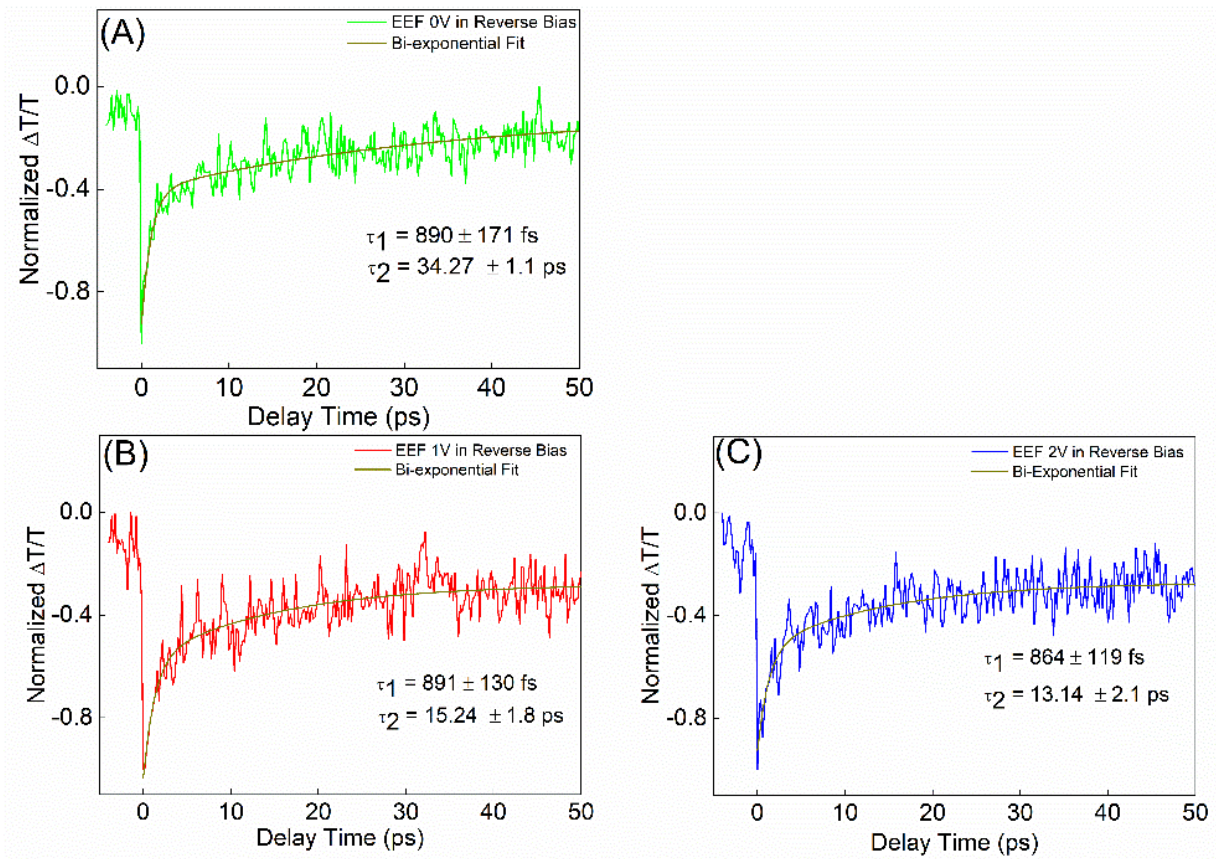

**Fig. S8** Fitting results using the exponential model for the differential transient transmission dynamics ( $\Delta T/T$ ) obtained from the P3HT device where the external electric field is varied. For the experiment, a pump excitation fluence of  $4 \mu\text{J}/\text{cm}^2$  was chosen.



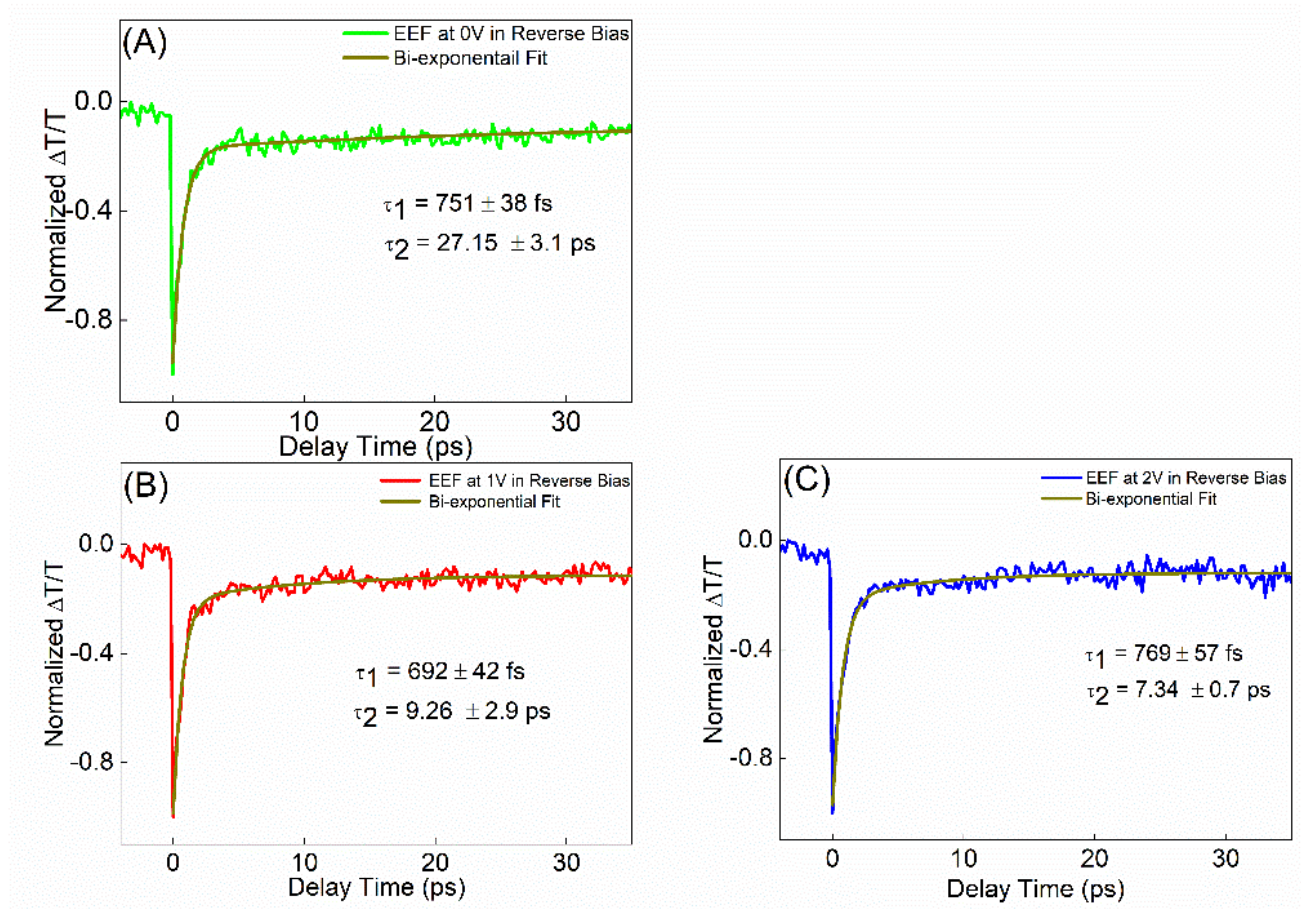

**Fig. S9** Fitting results using the exponential model for the differential transient transmission dynamics ( $\Delta T/T$ ) obtained from the P3HT device where the external electric field is varied. For the experiment, a pump excitation fluence of  $20 \mu\text{J}/\text{cm}^2$  was chosen.

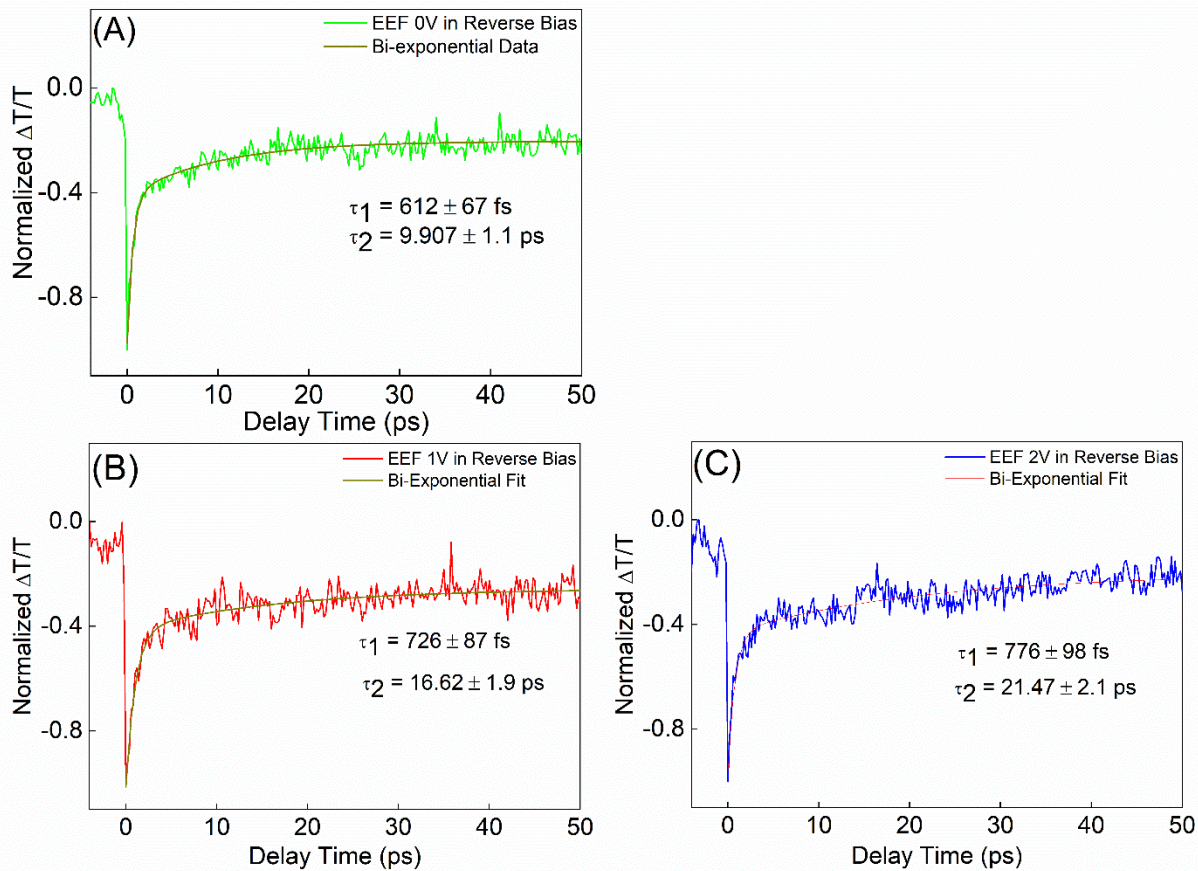

**Fig. S10** Fitting results using the exponential model for the transient transmission dynamics ( $\Delta T/T$ ) obtained from the P3HT device where the external electric field is varied. For the experiment, a pump excitation fluence of  $28 \mu\text{J}/\text{cm}^2$  was chosen.

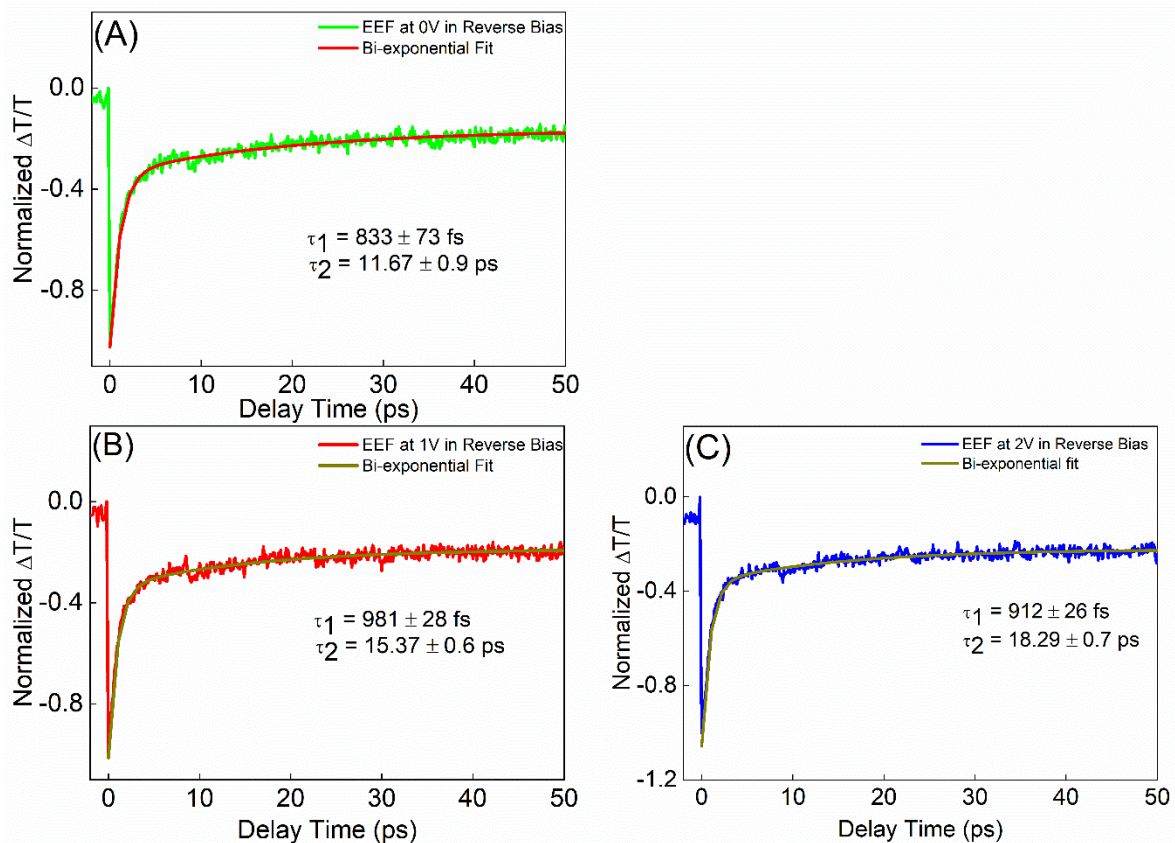

**Fig. S11** Fitting results using the exponential model for the differential transient transmission dynamics ( $\Delta T/T$ ) obtained from the P3HT device where the external electric field is varied. For the experiment, a pump excitation fluence of  $36 \mu\text{J}/\text{cm}^2$  was chosen.

## 5. Fitting of Observed Dynamics Using Annihilation Model

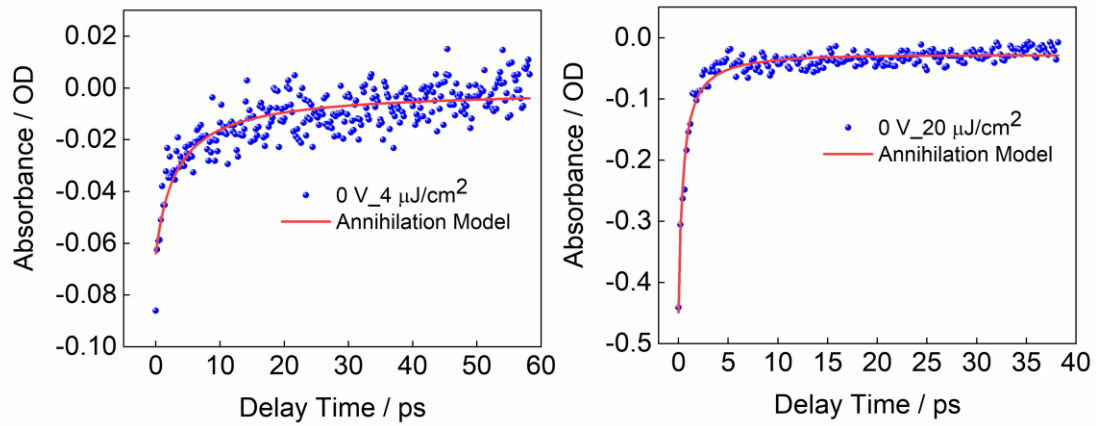

**Fig. S12** Fitting results using the annihilation model for the differential transient transmission dynamics ( $\Delta T/T$ ) obtained from the P3HT device where the external electric field is 0 V and hence only the built-in potential is present. For the experiment, a pump excitation fluence of 4 and 20  $\mu\text{J}/\text{cm}^2$  was chosen.

## 7. Fitting Parameters Obtained Using Annihilation Model

**Table S1** The annihilation rate constants obtained for the neat P3HT diode for an external applied field in reverse bias with 0, -1, and -2 V (built-in-potential must be added) at different excitation fluences (compare plots in Fig. 6 (A) and (B)).

|             | <b>4 <math>\mu\text{J}/\text{cm}^2</math></b> | <b>20 <math>\mu\text{J}/\text{cm}^2</math></b> | <b>28 <math>\mu\text{J}/\text{cm}^2</math></b> | <b>36 <math>\mu\text{J}/\text{cm}^2</math></b> |
|-------------|-----------------------------------------------|------------------------------------------------|------------------------------------------------|------------------------------------------------|
| <b>0 V</b>  | $(4.41 \pm 0.015) \cdot 10^{-7}$              | $(4.68 \pm 0.013) \cdot 10^{-7}$               | $(3.87 \pm 0.011) \cdot 10^{-7}$               | $(9.00 \pm 0.015) \cdot 10^{-8}$               |
| <b>-1 V</b> | $(4.23 \pm 0.03) \cdot 10^{-7}$               | $(4.59 \pm 0.015) \cdot 10^{-7}$               | $(4.59 \pm 0.021) \cdot 10^{-7}$               | $(9.00 \pm 0.013) \cdot 10^{-8}$               |
| <b>-2 V</b> | $(4.14 \pm 0.02) \cdot 10^{-7}$               | $(4.50 \pm 0.017) \cdot 10^{-7}$               | $(4.68 \pm 0.016) \cdot 10^{-7}$               | $(1.08 \pm 0.014) \cdot 10^{-8}$               |

**Table S2** The dissociation time constants obtained for the neat P3HT diode for an external applied field in reverse bias with 0, -1, and -2 V (built-in-potential must be added) at different excitation fluences (compare plots in Fig. 6 (C) and (D)).

|            | <b>4 <math>\mu\text{J}/\text{cm}^2</math></b> | <b>20 <math>\mu\text{J}/\text{cm}^2</math></b> | <b>28 <math>\mu\text{J}/\text{cm}^2</math></b> | <b>36 <math>\mu\text{J}/\text{cm}^2</math></b> |
|------------|-----------------------------------------------|------------------------------------------------|------------------------------------------------|------------------------------------------------|
| <b>0V</b>  | $16.47 \pm 0.11$                              | $6.68 \pm 0.02$                                | $6,64 \pm 0.02$                                | $9.51 \pm 0.02$                                |
| <b>-1V</b> | $15.74 \pm 0.09$                              | $5.74 \pm 0.01$                                | $5,73 \pm 0.01$                                | $8.02 \pm 0.02$                                |
| <b>-2V</b> | $14.17 \pm 0.06$                              | $5.68 \pm 0.02$                                | $5,68 \pm 0.01$                                | $7.21 \pm 0.02$                                |
